# Supplementary material
Source: PubMed Central journal article supplement (PMC10202625)

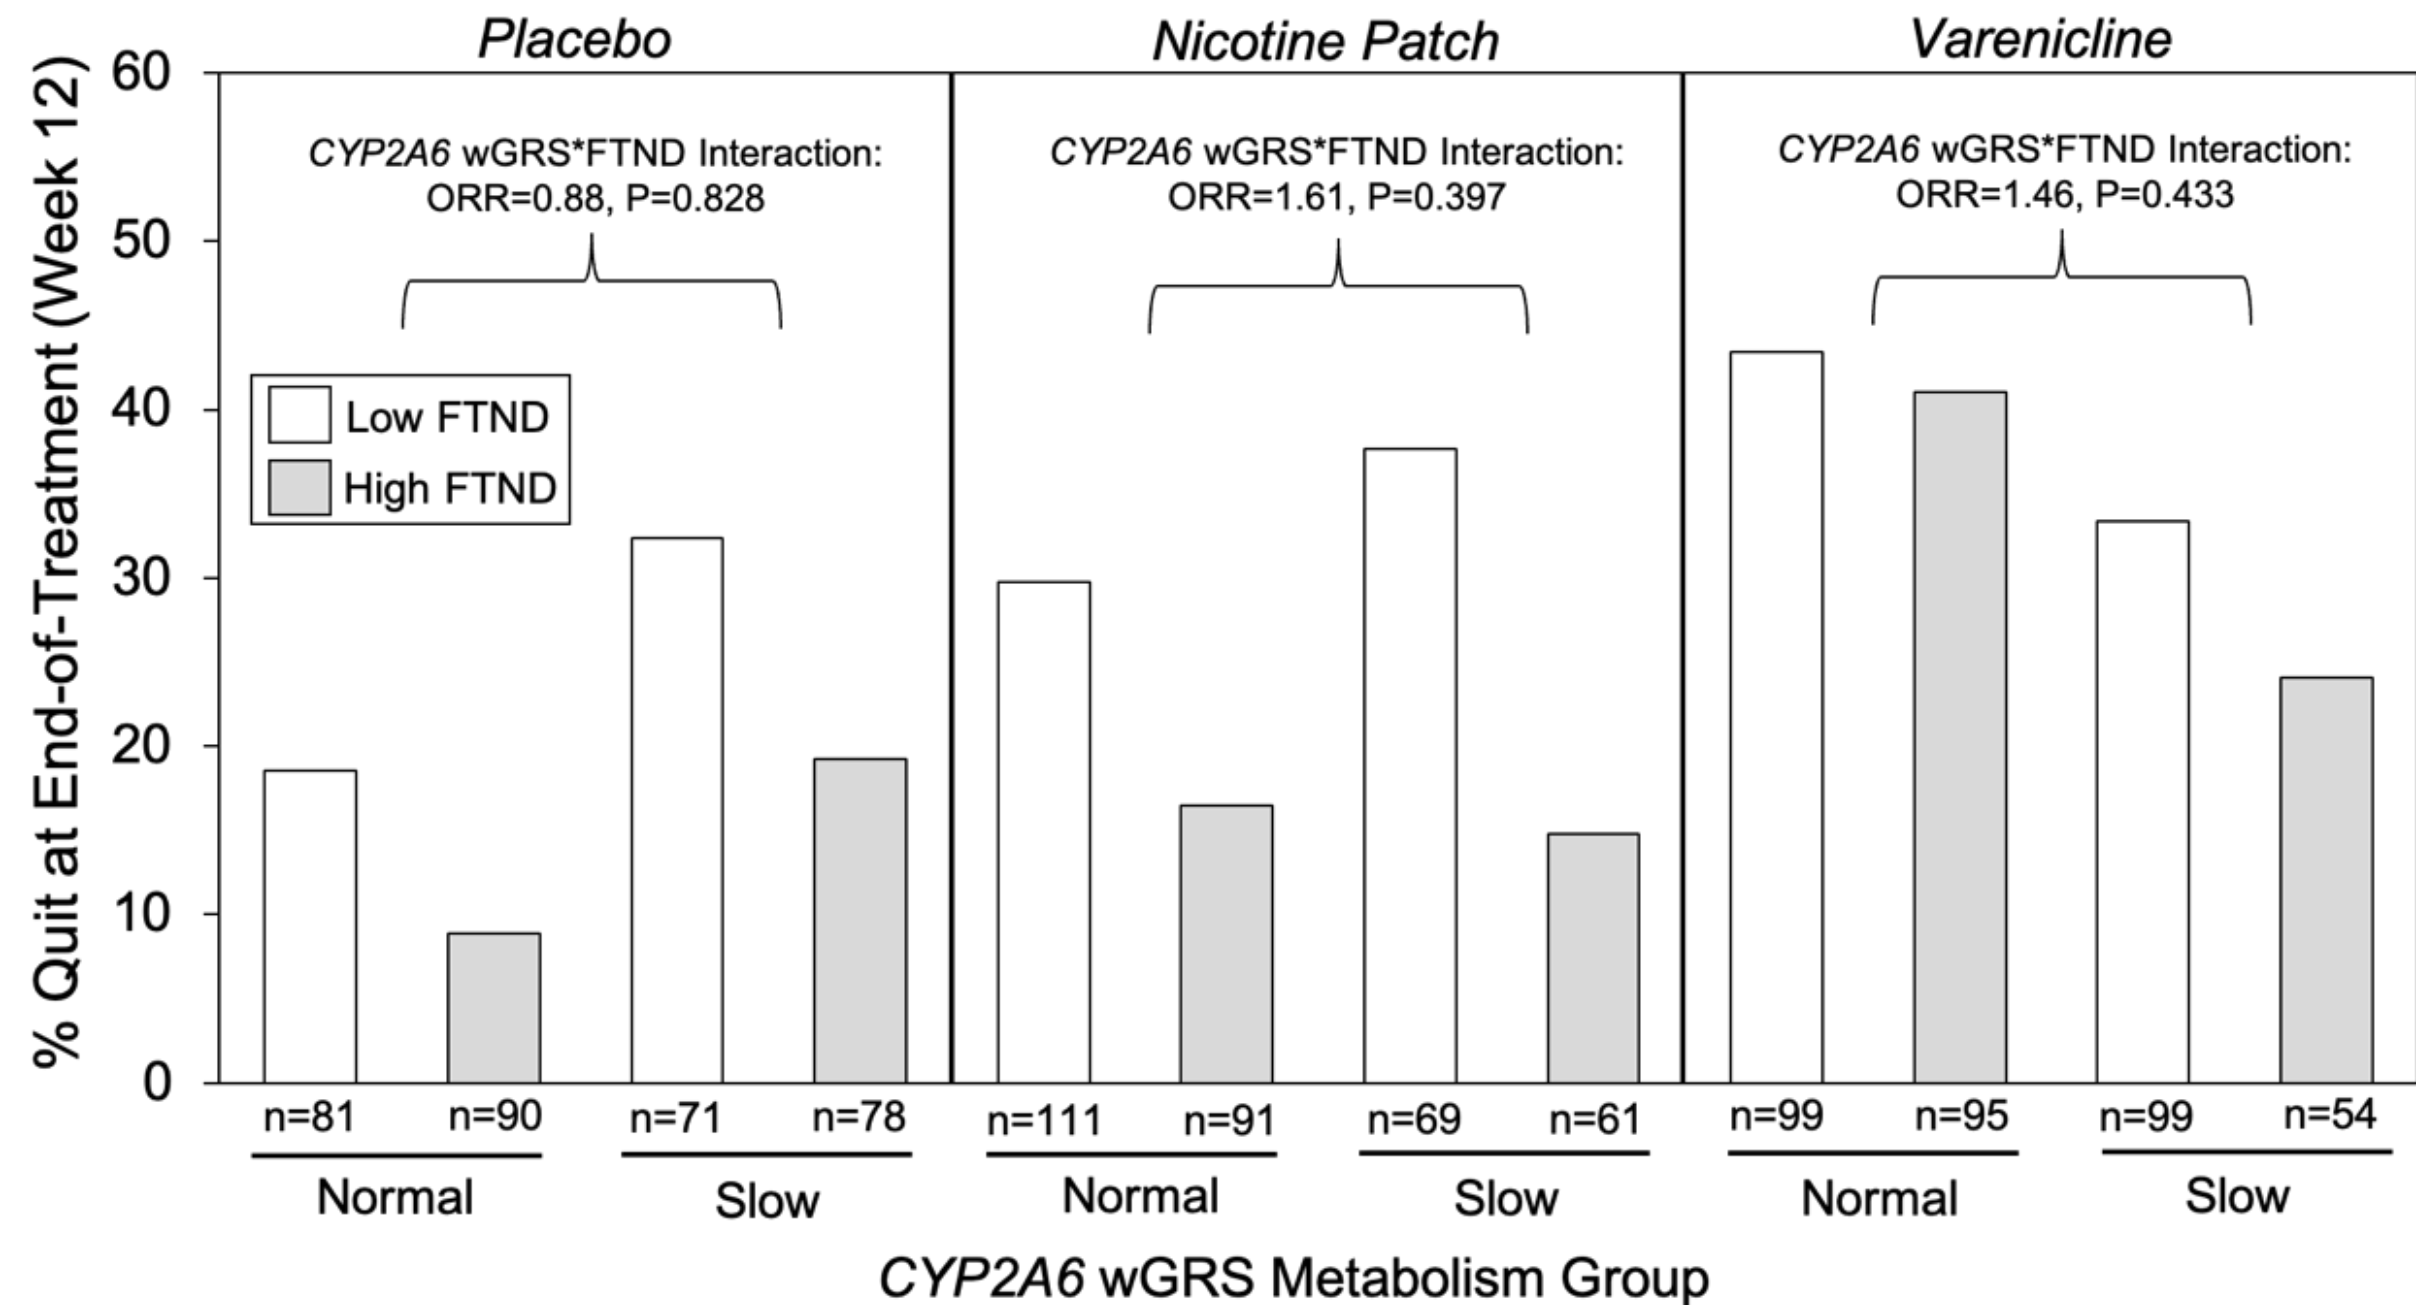

Supplement: ntac268_suppl_supplementary_figure_s1.pdf [file ntac268_suppl_supplementary_figure_s1.pdf]
